# Supplementary material for: Reverse Genetics of RNA Viruses: ISA-Based Approach to Control Viral Population Diversity without Modifying Virus Phenotype
Source: MDPI journal article supplement (doi:10.3390/v11070666), 2019-07-20
Supplement: s1 [file s1]

|                 | Forward                  | Reverse                  |
|-----------------|--------------------------|--------------------------|
| First Fragment  | AGATTTTCTTGACGTGCATGCGT  | GTGTTATCAACATAGCCACGTTCA |
| Second Fragment | ACAGTGGACATGATACAGTGGTCA | GCCACTAACTGCATCTTCCTTGT  |
| Third Fragment  | CATGGAAGGAGACGGTCATTCACT | CCTCTCGGCCATCTTCATTGCTCT |
| Fourth Fragment | GGATGCGCGCATGTTTCAGAGA   | TGCCAGTCGTTCCAGAATCCAGT  |
| Fifth Fragment  | AGGATGTCGTGCGAATGGCCAT   | AGCGGGTGTTTTCCGAGTCACTCA |

**Table S3:** Primer sequences used to produce overlapping amplicons covering the entire viral genome, for sequencing.
