# Supplementary material for: Reverse Genetics of RNA Viruses: ISA-Based Approach to Control Viral Population Diversity without Modifying Virus Phenotype
Source: MDPI journal article supplement (doi:10.3390/v11070666), 2019-07-20
Supplement: s1 [file s1]

|                 | Forward                  | Reverse                     |
|-----------------|--------------------------|-----------------------------|
| First Fragment  | CAGGGTTATTGTCTCATGAGCGGA | GCCACGCCCAGGAAGAGCATGA      |
| Second Fragment | GGGCCCTCTGGAAATGGGGAGA   | CAACCCAGGCTTGTACCATCTTT     |
| Third Fragment  | GGGTGAGGTCGTGGACCTTGA    | CCTAGGAATTCACAAATAAAGCATTTT |

**Table S1:** Primers sequences used for the PCR step of the ISA method.
