# Supplementary material for: Reverse Genetics of RNA Viruses: ISA-Based Approach to Control Viral Population Diversity without Modifying Virus Phenotype
Source: MDPI journal article supplement (doi:10.3390/v11070666), 2019-07-20
Supplement: s1 [file s1]

|                |                          |
|----------------|--------------------------|
| Forward Primer | GCAGAGTGGGCCAGGAACAT     |
| Probe          | TCGGACAAGAGAAGTTCAAGGACT |
| Reverse Primer | GTCATGCCGATCCATGCAGGA    |

**Table S2:** Primers and probe sequences used for the quantitative real-time (RT)-PCR assays.
