# Supplementary material for: Reverse Genetics of RNA Viruses: ISA-Based Approach to Control Viral Population Diversity without Modifying Virus Phenotype
Source: MDPI journal article supplement (doi:10.3390/v11070666), 2019-07-20
Supplement: s1 [file s1]

| Virus         | Mutation Position | Region    | Frequency | Nucleotide | Transition / Transversion | Amino acid | Synonymous / Non-Synonymous |
|---------------|-------------------|-----------|-----------|------------|---------------------------|------------|-----------------------------|
| Osh_IC #1     | 2347              | glycoprot | 0,0100    | A->G       | Transition                | Asp -> Gly | Non-Synonymous              |
| Osh_IC #1     | 6147              | DEXDc     | 0,0105    | G->A       | Transition                | Ala -> Thr | Non-Synonymous              |
| Osh_IC #1     | 10503             | NS5       | 0,0108    | G->A       | Transition                | Asp -> Asn | Non-Synonymous              |
| Osh_IC #1     | 11859             | 3' UTR    | 0,0224    | A->C       | Transversion              |            | UTR                         |
| Osh_IC #2     | 8528              |           | 0,0135    | C->T       | Transition                |            |                             |
| Osh_IC #2     | 2511              | glycoprot | 0,0176    | G->A       | Transition                | Gly -> Arg | Non-Synonymous              |
| Osh_IC #2     | 11859             | 3' UTR    | 0,0214    | A->C       | Transversion              |            | UTR                         |
| Osh_ISAtaq #1 | 2833              | E         | 0,0101    | A->G       | Transition                | Glu -> Gly | Non-Synonymous              |
| Osh_ISAtaq #1 | 7427              | NS4A      | 0,0111    | C->T       | Transition                | Gly        | Synonymous                  |
| Osh_ISAtaq #1 | 826               | 5'UTR     | 0,0116    | A->G       | Transition                |            | UTR                         |
| Osh_ISAtaq #1 | 11628             | 3' UTR    | 0,0117    | T->C       | Transition                |            | UTR                         |
| Osh_ISAtaq #1 | 6020              | DEXDc     | 0,0146    | T->C       | Transition                | Ile        | Synonymous                  |
| Osh_ISAtaq #1 | 8216              | NS4B      | 0,0165    | T->C       | Transition                | Leu        | Synonymous                  |
| Osh_ISAtaq #1 | 2362              | glycoprot | 0,0204    | A->G       | Transition                | His -> Arg | Non-Synonymous              |
| Osh_ISAtaq #1 | 2195              | glycoprot | 0,0212    | T->C       | Transition                | Ala        | Synonymous                  |
| Osh_ISAtaq #1 | 1641              | M         | 0,0229    | A->G       | Transition                | Thr -> Ala | Non-Synonymous              |
| Osh_ISAtaq #1 | 1627              | M         | 0,0248    | A->G       | Transition                | Lys -> Arg | Non-Synonymous              |
| Osh_ISAtaq #1 | 4715              | NS2A      | 0,0254    | T->C       | Transition                | Ala        | Synonymous                  |
| Osh_ISAtaq #1 | 2504              | glycoprot | 0,9193    | C->T       | Transition                | Tyr        | Synonymous                  |
| Osh_ISAtaq #1 | 11385             | 3' UTR    | 0,9221    | G->A       | Transition                |            | UTR                         |
| Osh_ISAtaq #1 | 7324              | NS4A      | 0,9317    | A->G       | Transition                | His -> Arg | Non-Synonymous              |
| Osh_ISAtaq #2 | 1799              | glycoprot | 0,0110    | A->G       | Transition                | Arg        | Synonymous                  |
| Osh_ISAtaq #2 | 4542              | NS2A      | 0,0110    | T->C       | Transition                | Leu        | Synonymous                  |
| Osh_ISAtaq #2 | 11279             | 3' UTR    | 0,0112    | A->G       | Transition                |            | UTR                         |
| Osh_ISAtaq #2 | 3359              | NS1       | 0,0112    | A->G       | Transition                | Ser        | Synonymous                  |
| Osh_ISAtaq #2 | 7932              | NS4B      | 0,0116    | C->T       | Transition                | Pro -> Ser | Non-Synonymous              |
| Osh_ISAtaq #2 | 8615              | FGsJ      | 0,0120    | A->G       | Transition                | Lys        | Synonymous                  |
| Osh_ISAtaq #2 | 2270              | glycoprot | 0,0121    | A->G       | Transition                | Gly        | Synonymous                  |
| Osh_ISAtaq #2 | 8892              | FGsJ      | 0,0122    | G->A       | Transition                | Ala -> Thr | Non-Synonymous              |
| Osh_ISAtaq #2 | 6554              | HELICc    | 0,0123    | T->C       | Transition                | Phe        | Synonymous                  |
| Osh_ISAtaq #2 | 9268              | NS5       | 0,0129    | A->G       | Transition                | Glu -> Arg | Non-Synonymous              |
| Osh_ISAtaq #2 | 6758              | HELICc    | 0,0131    | C->T       | Transition                | Val        | Synonymous                  |
| Osh_ISAtaq #2 | 8066              | NS4B      | 0,0138    | T->C       | Transition                | Ala        | Synonymous                  |
| Osh_ISAtaq #2 | 1247              |           | 0,0139    | A->G       | Transition                |            |                             |
| Osh_ISAtaq #2 | 834               | 5'UTR     | 0,0144    | A->G       | Transition                |            | UTR                         |
| Osh_ISAtaq #2 | 4874              | NS2A      | 0,0144    | A->G       | Transition                | Gly        | Synonymous                  |
| Osh_ISAtaq #2 | 4904              | NS2A      | 0,0145    | A->G       | Transition                | Leu        | Synonymous                  |
| Osh_ISAtaq #2 | 7731              | NS4B      | 0,0148    | A->G       | Transition                | Ser -> Gly | Non-Synonymous              |
| Osh_ISAtaq #2 | 2240              | glycoprot | 0,0149    | T->C       | Transition                | Val        | Synonymous                  |

|               |       |           |        |      |              |            |                |
|---------------|-------|-----------|--------|------|--------------|------------|----------------|
| Osh_ISAtaq #2 | 8509  |           | 0,0150 | C->T | Transition   |            |                |
| Osh_ISAtaq #2 | 2131  | glycoprot | 0,0152 | T->C | Transition   | Val -> Ala | Non-Synonymous |
| Osh_ISAtaq #2 | 2972  | E         | 0,0154 | A->G | Transition   | Glu        | Synonymous     |
| Osh_ISAtaq #2 | 9833  | NS5       | 0,0155 | A->G | Transition   | Gly        | Synonymous     |
| Osh_ISAtaq #2 | 8048  | NS4B      | 0,0155 | G->A | Transition   | Val        | Synonymous     |
| Osh_ISAtaq #2 | 4360  | NS2A      | 0,0156 | G->T | Transversion | Arg -> Leu | Non-Synonymous |
| Osh_ISAtaq #2 | 819   | 5'UTR     | 0,0174 | A->G | Transition   |            | UTR            |
| Osh_ISAtaq #2 | 6350  | DEXDc     | 0,0176 | T->C | Transition   | Ser        | Synonymous     |
| Osh_ISAtaq #2 | 8528  |           | 0,0196 | C->T | Transition   |            |                |
| Osh_ISAtaq #2 | 7447  | NS4A      | 0,0217 | T->C | Transition   | Val -> Ala | Non-Synonymous |
| Osh_ISAtaq #2 | 6404  |           | 0,0235 | T->C | Transition   |            |                |
| Osh_ISAtaq #2 | 8548  |           | 0,0236 | A->G | Transition   |            |                |
| Osh_ISAtaq #2 | 3177  | E         | 0,0292 | T->C | Transition   | Phe -> Leu | Non-Synonymous |
| Osh_ISAtaq #2 | 4052  | NS1       | 0,0296 | A->G | Transition   | Arg        | Synonymous     |
| Osh_ISAtaq #2 | 4922  | NS2A      | 0,0356 | T->C | Transition   | Ser        | Synonymous     |
| Osh_ISAtaq #2 | 8057  | NS4B      | 0,0468 | A->G | Transition   | Gly        | Synonymous     |
| Osh_ISAtaq #2 | 9280  | NS5       | 0,0480 | G->A | Transition   | Ser -> Asn | Non-Synonymous |
| Osh_ISAtaq #2 | 9542  | NS5       | 0,0524 | C->T | Transition   | Gly        | Synonymous     |
| Osh_ISAtaq #2 | 1782  | glycoprot | 0,0527 | A->G | Transition   | Thr -> Ala | Non-Synonymous |
| Osh_ISAtaq #2 | 1577  | M         | 0,0553 | A->G | Transition   | Glu        | Synonymous     |
| Osh_ISAtaq #2 | 9922  | NS5       | 0,0556 | A->G | Transition   | His -> Arg | Non-Synonymous |
| Osh_ISAtaq #2 | 10961 | NS5       | 0,0596 | T->C | Transition   | Ser        | Synonymous     |
| Osh_ISAtaq #2 | 8224  | NS4B      | 0,0614 | T->C | Transition   | Met -> Thr | Non-Synonymous |
| Osh_ISAtaq #2 | 1382  | propep    | 0,0616 | A->G | Transition   | Ser        | Synonymous     |
| Osh_ISAtaq #2 | 3212  | E         | 0,0622 | A->G | Transition   | Thr        | Synonymous     |
| Osh_ISAtaq #2 | 10340 | NS5       | 0,0625 | A->G | Transition   | Ala        | Synonymous     |
| Osh_ISAtaq #2 | 3435  | NS1       | 0,0626 | A->G | Transition   | Ser -> Gly | Non-Synonymous |
| Osh_ISAtaq #2 | 10421 | NS5       | 0,0628 | C->T | Transition   | Gly        | Synonymous     |
| Osh_ISAtaq #2 | 8441  |           | 0,0650 | T->C | Transition   |            |                |
| Osh_ISAtaq #2 | 2251  | glycoprot | 0,0682 | A->G | Transition   | Lys -> Arg | Non-Synonymous |
| Osh_ISAtaq #2 | 2300  | glycoprot | 0,0710 | A->G | Transition   | Arg        | Synonymous     |
| Osh_ISAtaq #2 | 10553 | NS5       | 0,0711 | C->T | Transition   | Val        | Synonymous     |
| Osh_ISAtaq #2 | 2047  | glycoprot | 0,0714 | A->G | Transition   | Asn -> Ser | Non-Synonymous |
| Osh_ISAtaq #2 | 7595  | NS4A      | 0,0716 | G->A | Transition   | Ala        | Synonymous     |
| Osh_ISAtaq #2 | 1079  | C prot    | 0,0719 | G->A | Transition   | Lys        | Synonymous     |
| Osh_ISAtaq #2 | 9285  | NS5       | 0,0738 | T->C | Transition   | Leu        | Synonymous     |
| Osh_ISAtaq #2 | 6425  |           | 0,0742 | A->G | Transition   |            |                |
| Osh_ISAtaq #2 | 8705  | FGsJ      | 0,0759 | A->G | Transition   | Ala        | Synonymous     |
| Osh_ISAtaq #2 | 5861  | NS3       | 0,0766 | C->T | Transition   | Ser        | Synonymous     |
| Osh_ISAtaq #2 | 4734  | NS2A      | 0,0780 | A->G | Transition   | Thr -> Ala | Non-Synonymous |
| Osh_ISAtaq #2 | 8579  |           | 0,0788 | C->T | Transition   |            |                |
| Osh_ISAtaq #2 | 3302  |           | 0,0797 | A->G | Transition   |            |                |
| Osh_ISAtaq #2 | 7262  | NS4A      | 0,0829 | G->A | Transition   | Gly        | Synonymous     |

|               |       |           |        |      |              |            |                |
|---------------|-------|-----------|--------|------|--------------|------------|----------------|
| Osh_ISAtaq #2 | 3848  | NS1       | 0,0862 | T->C | Transition   | Asn        | Synonymous     |
| Osh_ISAtaq #2 | 991   | C prot    | 0,0979 | T->C | Transition   | Val -> Ala | Non-Synonymous |
| Osh_ISAtaq #2 | 11209 | 3' UTR    | 0,1067 | A->G | Transition   |            | UTR            |
| Osh_ISAtaq #2 | 1462  | propep    | 0,1122 | T->C | Transition   | Val -> Ala | Non-Synonymous |
| Osh_ISAtaq #2 | 11746 | 3' UTR    | 0,1143 | C->T | Transition   |            | UTR            |
| Osh_ISAtaq #2 | 11714 | 3' UTR    | 0,1185 | A->G | Transition   |            | UTR            |
| Osh_ISAtaq #2 | 3372  | NS1       | 0,3948 | A->G | Transition   | Thr -> Ala | Non-Synonymous |
| Osh_ISAtaq #2 | 11716 | 3' UTR    | 0,4156 | A->G | Transition   |            | UTR            |
| Osh_ISAtaq #2 | 7520  | NS4A      | 0,4206 | T->C | Transition   | Gly        | Synonymous     |
| Osh_ISAtaq #2 | 2509  | glycoprot | 0,4299 | T->A | Transversion | Leu -> His | Non-Synonymous |
| Osh_ISAtaq #2 | 1237  |           | 0,4325 | T->C | Transition   |            |                |
| Osh_ISAtaq #2 | 2139  | glycoprot | 0,4432 | G->A | Transition   | Ala -> Thr | Non-Synonymous |
| Osh_ISAtaq #2 | 2111  | glycoprot | 0,4496 | A->G | Transition   | Lys        | Synonymous     |
| Osh_ISAtaq #2 | 3674  | NS1       | 0,4544 | A->G | Transition   | Arg        | Synonymous     |
| Osh_ISAtaq #3 | 7409  | NS4A      | 0,0117 | C->T | Transition   | Leu        | Synonymous     |
| Osh_ISAtaq #3 | 2948  | E         | 0,0119 | T->C | Transition   | Phe        | Synonymous     |
| Osh_ISAtaq #3 | 8528  |           | 0,0125 | C->T | Transition   |            |                |
| Osh_ISAtaq #3 | 2555  | glycoprot | 0,0145 | T->A | Transversion | Pro        | Synonymous     |
| Osh_ISAtaq #3 | 2356  | glycoprot | 0,0152 | C->T | Transition   | Ser -> Leu | Non-Synonymous |
| Osh_ISAtaq #3 | 10124 | NS5       | 0,0174 | A->G | Transition   | Gln        | Synonymous     |
| Osh_ISAtaq #3 | 6045  | DEXDc     | 0,0204 | T->C | Transition   | Leu        | Synonymous     |
| Osh_ISAtaq #3 | 6827  |           | 0,0211 | T->C | Transition   |            |                |
| Osh_ISAtaq #3 | 7835  | NS4B      | 0,9545 | A->G | Transition   | Pro        | Synonymous     |
| Osh_ISAtaq #3 | 1687  |           | 0,9580 | T->C | Transition   |            |                |
| Osh_ISAtaq #3 | 6397  |           | 0,9647 | A->G | Transition   |            |                |
| Osh_ISAtaq #3 | 2128  | glycoprot | 0,9675 | A->G | Transition   | His -> Arg | Non-Synonymous |
| Osh_ISAtaq #3 | 3482  | NS1       | 0,9678 | T->C | Transition   | Asn        | Synonymous     |
| Osh_ISApfu #1 | 1668  | M         | 0,0106 | C->A | Transversion | Leu -> Met | Non-Synonymous |
| Osh_ISApfu #1 | 2203  | glycoprot | 0,0109 | A->G | Transition   | Glu -> Gly | Non-Synonymous |
| Osh_ISApfu #1 | 11015 | NS5       | 0,0129 | C->T | Transition   | Ala        | Synonymous     |
| Osh_ISApfu #1 | 7729  | NS4B      | 0,0136 | G->T | Transversion | Trp -> Leu | Non-Synonymous |
| Osh_ISApfu #1 | 4530  | NS2A      | 0,0174 | G->T | Transversion | Ala -> Ser | Non-Synonymous |
| Osh_ISApfu #1 | 8251  | NS4B      | 0,0184 | C->T | Transition   | Pro -> Leu | Non-Synonymous |
| Osh_ISApfu #1 | 3854  | NS1       | 0,0220 | A->G | Transition   | Thr        | Synonymous     |
| Osh_ISApfu #1 | 9395  | NS5       | 0,0241 | G->T | Transversion | Leu        | Synonymous     |
| Osh_ISApfu #1 | 8718  | FGsJ      | 0,0285 | G->T | Transversion | Ala -> Ser | Non-Synonymous |
| Osh_ISApfu #1 | 2486  | glycoprot | 0,0306 | T->A | Transversion | Ala        | Synonymous     |
| Osh_ISApfu #1 | 4659  | NS2A      | 0,0392 | G->T | Transversion | Gly -> Trp | Non-Synonymous |
| Osh_ISApfu #1 | 1765  | glycoprot | 0,0618 | G->T | Transversion | Arg -> Met | Non-Synonymous |
| Osh_ISApfu #1 | 8429  | NS4B      | 0,0718 | G->A | Transition   | Arg        | Synonymous     |
| Osh_ISApfu #2 | 10912 | NS5       | 0,0101 | G->A | Transition   | Gly -> Asp | Non-Synonymous |
| Osh_ISApfu #2 | 8918  | FGsJ      | 0,0110 | G->T | Transversion | Arg        | Synonymous     |
| Osh_ISApfu #2 | 11383 | 3' UTR    | 0,0112 | G->T | Transversion |            | UTR            |

|               |       |           |        |      |              |            |                |
|---------------|-------|-----------|--------|------|--------------|------------|----------------|
| Osh_ISApfu #2 | 7932  | NS4B      | 0,0121 | C->T | Transition   | Pro -> Ser | Non-Synonymous |
| Osh_ISApfu #2 | 1765  | glycoprot | 0,0129 | G->T | Transversion | Arg -> Met | Non-Synonymous |
| Osh_ISApfu #2 | 11682 | 3' UTR    | 0,0130 | C->T | Transition   |            | UTR            |
| Osh_ISApfu #2 | 8528  |           | 0,0137 | C->T | Transition   |            |                |
| Osh_ISApfu #2 | 8378  | NS4B      | 0,0199 | G->T | Transversion | Trp -> Cys | Non-Synonymous |
| Osh_ISApfu #2 | 4319  |           | 0,0207 | C->T | Transition   |            |                |
| Osh_ISApfu #2 | 2770  | E         | 0,0214 | C->T | Transition   | Ala -> Val | Non-Synonymous |
| Osh_ISApfu #2 | 1350  | propep    | 0,0215 | G->T | Transversion | Ala -> Ser | Non-Synonymous |
| Osh_ISApfu #2 | 8305  | NS4B      | 0,0217 | G->T | Transversion | Arg -> Ile | Non-Synonymous |
| Osh_ISApfu #2 | 6147  | DEXDc     | 0,0266 | G->A | Transition   | Ala -> Thr | Non-Synonymous |
| Osh_ISApfu #2 | 8773  | FGsJ      | 0,0274 | A->G | Transition   | Lys -> Arg | Non-Synonymous |
| Osh_ISApfu #2 | 7150  |           | 0,0277 | G->A | Transition   |            |                |
| Osh_ISApfu #2 | 11099 | NS5       | 0,0350 | G->A | Transition   | Arg        | Synonymous     |
| Osh_ISApfu #2 | 6275  | DEXDc     | 0,0390 | G->T | Transversion | Arg        | Synonymous     |
| Osh_ISApfu #2 | 5036  | NS2B      | 0,0544 | G->A | Transition   | Arg        | Synonymous     |
| Osh_ISApfu #2 | 3512  | NS1       | 0,1018 | C->A | Transversion | Pro        | Synonymous     |
| Osh_ISApfu #3 | 5711  | NS3       | 0,0100 | C->A | Transversion | Pro        | Synonymous     |
| Osh_ISApfu #3 | 11087 | NS5       | 0,0102 | C->A | Transversion | Ser        | Synonymous     |
| Osh_ISApfu #3 | 11556 | 3' UTR    | 0,0104 | C->T | Transition   |            | UTR            |
| Osh_ISApfu #3 | 5195  | NS2B      | 0,0105 | G->T | Transversion | Arg        | Synonymous     |
| Osh_ISApfu #3 | 1976  | glycoprot | 0,0105 | T->A | Transversion | Pro        | Synonymous     |
| Osh_ISApfu #3 | 8019  | NS4B      | 0,0106 | G->T | Transversion | Gly -> Cys | Non-Synonymous |
| Osh_ISApfu #3 | 6986  |           | 0,0110 | T->C | Transition   |            |                |
| Osh_ISApfu #3 | 3713  | NS1       | 0,0113 | C->A | Transversion | Gly        | Synonymous     |
| Osh_ISApfu #3 | 1407  | propep    | 0,0115 | G->C | Transversion | Asp -> His | Non-Synonymous |
| Osh_ISApfu #3 | 6884  |           | 0,0117 | T->C | Transition   |            |                |
| Osh_ISApfu #3 | 7880  | NS4B      | 0,0117 | C->T | Transition   | Asn        | Synonymous     |
| Osh_ISApfu #3 | 1414  | propep    | 0,0118 | G->T | Transversion | Gly -> Val | Non-Synonymous |
| Osh_ISApfu #3 | 4346  | NS2A      | 0,0122 | T->C | Transition   | Leu        | Synonymous     |
| Osh_ISApfu #3 | 4082  | NS1       | 0,0123 | G->T | Transversion | Arg -> Ser | Non-Synonymous |
| Osh_ISApfu #3 | 2087  | glycoprot | 0,0132 | T->C | Transition   | Cys        | Synonymous     |
| Osh_ISApfu #3 | 2406  | glycoprot | 0,0155 | C->T | Transition   | Leu        | Synonymous     |
| Osh_ISApfu #3 | 3132  | E         | 0,0158 | G->T | Transversion | Ala -> Ser | Non-Synonymous |
| Osh_ISApfu #3 | 1343  | propep    | 0,0165 | G->A | Transition   | Val        | Synonymous     |
| Osh_ISApfu #3 | 9778  | NS5       | 0,0172 | C->T | Transition   | Ala -> Val | Non-Synonymous |
| Osh_ISApfu #3 | 2174  | glycoprot | 0,0172 | G->A | Transition   | Pro        | Synonymous     |
| Osh_ISApfu #3 | 6641  | HELICc    | 0,0172 | G->T | Transversion | Val        | Synonymous     |
| Osh_ISApfu #3 | 1822  | glycoprot | 0,0173 | G->T | Transversion | Gly -> Ala | Non-Synonymous |
| Osh_ISApfu #3 | 8918  | FGsJ      | 0,0201 | G->A | Transition   | Arg        | Synonymous     |
| Osh_ISApfu #3 | 7932  | NS4B      | 0,0221 | C->T | Transition   | Pro -> Ser | Non-Synonymous |
| Osh_ISApfu #3 | 8528  |           | 0,0221 | C->T | Transition   |            |                |
| Osh_ISApfu #3 | 2347  | glycoprot | 0,0298 | A->G | Transition   | Asp -> Gly | Non-Synonymous |
| Osh_ISApfu #3 | 8540  |           | 0,0365 | A->C | Transversion |            |                |

|                           |       |           |        |      |              |            |                |
|---------------------------|-------|-----------|--------|------|--------------|------------|----------------|
| Osh_ISA <sub>pfu</sub> #3 | 7383  | NS4A      | 0,0461 | T->A | Transversion | Leu -> Met | Non-Synonymous |
| Osh_ISA <sub>pfu</sub> #3 | 11859 | 3' UTR    | 0,0481 | A->C | Transversion |            | UTR            |
| Osh_ISA <sub>pfu</sub> #3 | 3193  | E         | 0,0532 | G->T | Transversion | Gly -> Val | Non-Synonymous |
| Osh_ISA <sub>pfu</sub> #3 | 6722  | HELICc    | 0,0554 | G->T | Transversion | Val        | Synonymous     |
| Osh_ISA <sub>pfu</sub> #3 | 7672  |           | 0,0566 | C->T | Transition   |            |                |
| Osh_ISA <sub>pfu</sub> #3 | 1350  | propep    | 0,0680 | G->T | Transversion | Ala -> Ser | Non-Synonymous |
| Osh_ISA <sub>phu</sub> #1 | 4407  | NS2A      | 0,0123 | G->T | Transversion | Val -> Phe | Non-Synonymous |
| Osh_ISA <sub>phu</sub> #1 | 8304  | NS4B      | 0,0129 | A->G | Transition   | Arg -> Gly | Non-Synonymous |
| Osh_ISA <sub>phu</sub> #1 | 3348  | NS1       | 0,0135 | G->T | Transversion | Ala -> Ser | Non-Synonymous |
| Osh_ISA <sub>phu</sub> #1 | 11859 | 3' UTR    | 0,0147 | A->C | Transversion |            | UTR            |
| Osh_ISA <sub>phu</sub> #1 | 10869 | NS5       | 0,0158 | G->A | Transition   | Val -> Ile | Non-Synonymous |
| Osh_ISA <sub>phu</sub> #1 | 5891  |           | 0,0163 | C->T | Transition   |            |                |
| Osh_ISA <sub>phu</sub> #1 | 978   | C prot    | 0,0171 | C->T | Transition   | Arg -> Cys | Non-Synonymous |
| Osh_ISA <sub>phu</sub> #1 | 2950  | E         | 0,0188 | A->G | Transition   | Gln -> Arg | Non-Synonymous |
| Osh_ISA <sub>phu</sub> #1 | 2322  | glycoprot | 0,0196 | G->T | Transversion | Ala -> Ser | Non-Synonymous |
| Osh_ISA <sub>phu</sub> #1 | 9872  | NS5       | 0,0218 | G->T | Transversion | Leu        | Synonymous     |
| Osh_ISA <sub>phu</sub> #1 | 11558 | 3' UTR    | 0,0305 | C->A | Transversion |            | UTR            |
| Osh_ISA <sub>phu</sub> #1 | 10742 | NS5       | 0,0536 | G->T | Transversion | Arg        | Synonymous     |
| Osh_ISA <sub>phu</sub> #1 | 2347  | glycoprot | 0,0581 | A->G | Transition   | Asp -> Gly | Non-Synonymous |
| Osh_ISA <sub>phu</sub> #1 | 935   | C prot    | 0,0590 | C->T | Transition   | Gly        | Synonymous     |
| Osh_ISA <sub>phu</sub> #1 | 6127  | DEXDc     | 0,0904 | G->T | Transversion | Gly -> Val | Non-Synonymous |
| Osh_ISA <sub>phu</sub> #1 | 7988  | NS4B      | 0,1302 | C->T | Transition   | Gly        | Synonymous     |
| Osh_ISA <sub>phu</sub> #1 | 5061  | NS2B      | 0,1321 | G->A | Transition   | Ala -> Thr | Non-Synonymous |
| Osh_ISA <sub>phu</sub> #1 | 8917  | FGsJ      | 0,2075 | G->T | Transversion | Arg -> Leu | Non-Synonymous |
| Osh_ISA <sub>phu</sub> #2 | 3987  | NS1       | 0,0103 | T->C | Transition   | Trp -> Arg | Non-Synonymous |
| Osh_ISA <sub>phu</sub> #2 | 1090  | C prot    | 0,0106 | A->G | Transition   | Asn -> Ser | Non-Synonymous |
| Osh_ISA <sub>phu</sub> #2 | 10452 | NS5       | 0,0115 | A->G | Transition   | Arg -> Gly | Non-Synonymous |
| Osh_ISA <sub>phu</sub> #2 | 8312  | NS4B      | 0,0150 | G->T | Transversion | Glu -> Asp | Non-Synonymous |
| Osh_ISA <sub>phu</sub> #2 | 9291  | NS5       | 0,0158 | G->A | Transition   | Glu -> Lys | Non-Synonymous |
| Osh_ISA <sub>phu</sub> #2 | 1424  | propep    | 0,0159 | G->T | Transversion | Pro        | Synonymous     |
| Osh_ISA <sub>phu</sub> #2 | 9056  | FGsJ      | 0,0159 | G->T | Transversion | Val        | Synonymous     |
| Osh_ISA <sub>phu</sub> #2 | 7313  | NS4A      | 0,0184 | C->T | Transition   | Tyr        | Synonymous     |
| Osh_ISA <sub>phu</sub> #2 | 7532  | NS4A      | 0,0187 | C->T | Transition   | Tyr        | Synonymous     |
| Osh_ISA <sub>phu</sub> #2 | 2373  | glycoprot | 0,0275 | G->T | Transversion | Ala -> Ser | Non-Synonymous |
| Osh_ISA <sub>phu</sub> #2 | 7126  |           | 0,0393 | C->A | Transversion |            |                |
| Osh_ISA <sub>phu</sub> #2 | 6965  |           | 0,0584 | G->A | Transition   |            |                |
| Osh_ISA <sub>phu</sub> #2 | 5357  | NS2B      | 0,0637 | G->T | Transversion | Thr        | Synonymous     |
| Osh_ISA <sub>phu</sub> #2 | 8151  | NS4B      | 0,0916 | G->A | Transition   | Gly -> Arg | Non-Synonymous |
| Osh_ISA <sub>phu</sub> #2 | 6127  | DEXDc     | 0,0974 | G->A | Transition   | Gly -> Glu | Non-Synonymous |
| Osh_ISA <sub>phu</sub> #2 | 5450  | NS3       | 0,0986 | C->A | Transversion | Phe -> Leu | Non-Synonymous |
| Osh_ISA <sub>phu</sub> #2 | 9395  | NS5       | 0,1036 | G->A | Transition   | Leu        | Synonymous     |
| Osh_ISA <sub>phu</sub> #2 | 3404  | NS1       | 0,1098 | C->A | Transversion | Pro        | Synonymous     |
| Osh_ISA <sub>phu</sub> #2 | 10911 | NS5       | 0,1443 | G->T | Transversion | Gly -> Cys | Non-Synonymous |

|               |       |           |        |      |              |            |                |
|---------------|-------|-----------|--------|------|--------------|------------|----------------|
| Osh_ISAphu #3 | 3386  | NS1       | 0,0122 | A->T | Transversion | Gly        | Synonymous     |
| Osh_ISAphu #3 | 3803  | NS1       | 0,0134 | G->A | Transition   | Met -> Ile | Non-Synonymous |
| Osh_ISAphu #3 | 3217  | E         | 0,0140 | G->T | Transversion | Gly -> Val | Non-Synonymous |
| Osh_ISAphu #3 | 866   | 5'UTR     | 0,0143 | A->G | Transition   |            | UTR            |
| Osh_ISAphu #3 | 7988  | NS4B      | 0,0145 | C->A | Transversion | Gly        | Synonymous     |
| Osh_ISAphu #3 | 1820  | glycoprot | 0,0160 | G->A | Transition   | Leu        | Synonymous     |
| Osh_ISAphu #3 | 4962  | NS2A      | 0,0165 | G->A | Transition   | Gly -> Arg | Non-Synonymous |
| Osh_ISAphu #3 | 1822  | glycoprot | 0,0174 | G->T | Transversion | Gly -> Ala | Non-Synonymous |
| Osh_ISAphu #3 | 9956  | NS5       | 0,0183 | G->A | Transition   | Val        | Synonymous     |
| Osh_ISAphu #3 | 9732  | NS5       | 0,0199 | C->A | Transversion | Gln -> Lys | Non-Synonymous |
| Osh_ISAphu #3 | 2378  | glycoprot | 0,0227 | G->T | Transversion | Trp -> Cys | Non-Synonymous |
| Osh_ISAphu #3 | 10808 | NS5       | 0,0258 | C->A | Transversion | Gly        | Synonymous     |
| Osh_ISAphu #3 | 11442 | 3' UTR    | 0,0473 | C->T | Transition   |            | UTR            |
| Osh_ISAphu #3 | 4937  | NS2A      | 0,1375 | G->A | Transition   | Leu        | Synonymous     |
| Osh_ISAphu #3 | 1553  | M         | 0,1441 | A->G | Transition   | Thr        | Synonymous     |

**Table S4:** Summary of all mutations detected
