# Supplementary material for: Reverse Genetics of RNA Viruses: ISA-Based Approach to Control Viral Population Diversity without Modifying Virus Phenotype
Source: MDPI journal article supplement (doi:10.3390/v11070666), 2019-07-20
Supplement: s1 [file s1]

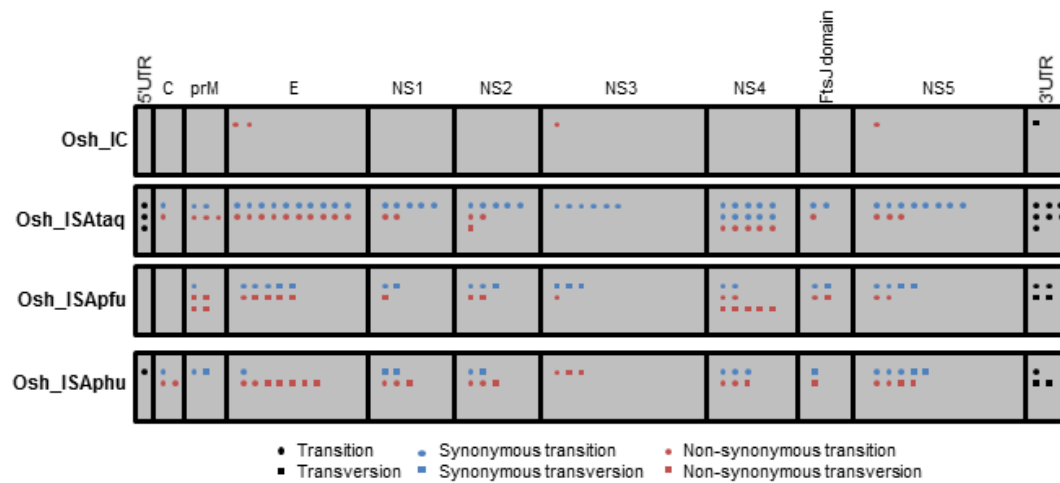

**Figure S1: Mutations distribution.** This figure summarizes the distribution of single nucleotide polymorphic sites detected on different regions of the viral genome.
