# Supplementary material for: Reverse Genetics of RNA Viruses: ISA-Based Approach to Control Viral Population Diversity without Modifying Virus Phenotype
Source: Viruses. 2019 Jul 20;11(7):666. doi: 10.3390/v11070666 (PMC6669666; doi:10.3390/v11070666)
Supplement: Supplementary file 1 [file viruses-11-00666-s001.zip]

Archive with 6 entries (6 files):
- Figure S1.pdf
- Figure S2.tif
- Table S1.pdf
- Table S2.pdf
- Table S3.pdf
- Table S4.pdf
